# Supplementary material for: Predicting metastatic potential of primary cutaneous melanomas utilizing weakly supervised vision language model
Source: Research Square preprint supplement (doi:10.21203/rs.3.rs-6297243/v1), 2025-03-26
Supplement: Supplementary file 1 [file 977013153c67557f852da2a3.docx]

**Supplementary material**


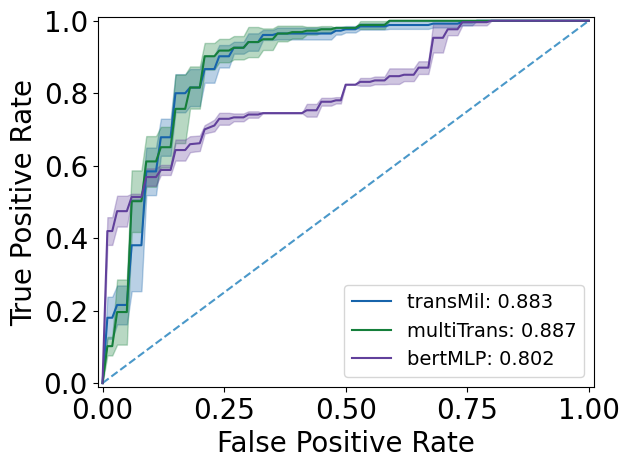


**Figure S1**. Mean receiver operating characteristic curves with noted AUC of the three ensemble models from the five-fold cross validation tested on the hold-out test set (n=85)

**
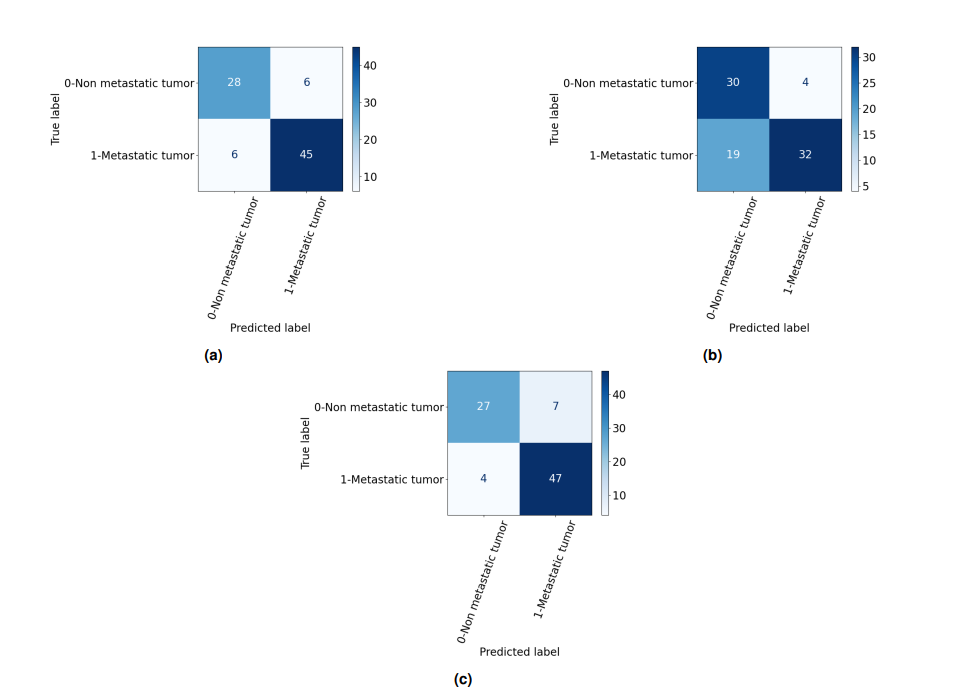
**

**Figure S2.** Confusion matrices of (a) TransMIL (b) BertMLP (c) MultiTrans, evaluated on the test set (n=85) at the Youden index.
